# Supplementary material for: Arabidopsis LBP/BPI related-1 and -2 bind to LPS directly and regulate PR1 expression
Source: PubMed Central journal article supplement (PMC4897604; doi:10.1038/srep27527), 2016-06-08
Supplement: srep27527-s1.pdf [file srep27527-s1.pdf]

***Arabidopsis* LBP/BPI related-1 and -2 bind to LPS directly and regulate *PR1* expression**

Sayaka Iizasa\*<sup>1, 2</sup>, Ei'ichi Iizasa<sup>3</sup>, Sawako Matsuzaki<sup>1, 4</sup>, Hiroyuki Tanaka<sup>5</sup>, Yutaka Kodama<sup>5</sup>, Keiichi Watanabe<sup>2, 4</sup>, and Yukio Nagano\*<sup>1, 2</sup>

<sup>1</sup>Analytical Research Center for Experimental Sciences, Saga University, 1 Honjo-machi, Saga 840-8502, Japan. <sup>2</sup>Department of Biological Science and Technology, The United Graduate School of Agricultural Sciences, Kagoshima University, 1-21-24 Korimoto, Kagoshima 890-8580, Japan. <sup>3</sup>Department of Immunology, Graduate School of Medical and Dental Sciences, Kagoshima University, 8-35-1 Sakuragaoka, Kagoshima 890-8544, Japan. <sup>4</sup>Department of Applied Biochemistry and Food Science, Faculty of Agriculture, Saga University, 1 Honjo-machi, Saga 840-8502, Japan. <sup>5</sup>Center for Bioscience Research and Education, Utsunomiya University, Tochigi 321-8505, Japan. Correspondence and requests for materials should be addressed to I. S. (k8930172@kadai.jp) or N. Y. (nagano@cc.saga-u.ac.jp)

Supplemental Table S1. Primers set used in this study.

For AtLBRs cloning and plasmid construction.

| Set      | F/R | Sequence                                       |
|----------|-----|------------------------------------------------|
| ATLBR-1n | F   | 5'-TTCGAGCTCCGTCGAACCGATTCATTCACATCGGT-3'      |
|          | R   | 5'-AGCAGCCGGATCTCATTATATAGGATCACTGGTGA-3'      |
| ATLBR-2n | F   | 5'-TTCGAGCTCCGTCGAAACAATGGCGGTCACATTTC-3'      |
|          | R   | 5'-AGCAGCCGGATCTCATTAGACAGGGTTGCCTGTAA-3'      |
| Nes1n    | F   | 5'-CCAAGTTTCTTCTTCTTGCC-3'                     |
|          | R   | 5'-GTGAAAACCTCTAACTACCGA-3'                    |
| Nes2n    | F   | 5'-TCTTCGTCTCGGTGTCATCG-3'                     |
|          | R   | 5'-GCCAACTTCAACTGTAGTTA-3'                     |
| pSU2amp  | F   | 5'-GGCCATGGCTGATATCGGATCCGAATTCGAGCTCCGTCGA-3' |
|          | R   | 5'-ACTCAGCTTCCTTTCGGGCTTTGTTAGCAGCCGGATCTCA-3' |

For semiquantitative RT-PCR.

| Set           | F/R | Sequence                    |
|---------------|-----|-----------------------------|
| RT-<br>AtLBR1 | F   | 5'-GCACCGATTCATTCACATCG-3'  |
|               | R   | 5'-CCTTTGGAAGGCTTTGTAGG-3'  |
| RT-<br>AtLBR2 | F   | 5'-GGTGGTTGATGCATTTCAA-3'   |
|               | R   | 5'-CTTCAGGCTTACGTACATGC -3' |
| RT-Actin      | F   | 5'-TCTTGATCTTGCTGGTCGTG-3'  |
|               | R   | 5'-GAGCTGGTTTTGGCTGTCTC-3'  |

For quantitative RT-PCR (qRT-PCR).

| Set                     | F/R | Sequence                          |
|-------------------------|-----|-----------------------------------|
| qAtLBR-1                | F   | 5'- CCATTGAGTTGGAAGGAGGA-3'       |
|                         | R   | 5'- TGGCAATGGTACTTTCCACA-3'       |
| qAtLBR-2                | F   | 5'- CGGGTCCATTCTAAGCACAT-3'       |
|                         | R   | 5'- ATCGTCGCATCAATTCCATT-3'       |
| qPR1                    | F   | 5'- GGAGCTACGCAGAACAATAAGA-3'     |
|                         | R   | 5'- CCCACGAGGATCATAGTTGCAACTGA-3' |
| qPR4                    | F   | 5'- TTGCTCCACGTGGGATGCTGAT-3'     |
|                         | R   | 5'- AGCTCATTGCCACAGTCGACAA-3'     |
| qPR5                    | F   | 5'- CGGTACAAGTGAAGGTGCTCGTT-3'    |
|                         | R   | 5'- GCCTCGTAGATGGTTACAATGTCA-3'   |
| q $\beta$ -<br>Tubulin4 | F   | 5'- GAGGGAGCCATTGACAACATCTT-3'    |
|                         | R   | 5'- GCGAACAGTTCACAGCTATGTTCA-3'   |

For Supplementary Fig. S1 (another set of *PR1* primers).

| Set    | F/R | Sequence                      |
|--------|-----|-------------------------------|
| qPR1-2 | F   | 5'- GTCTTTGTAGCTCTTGTAGGTG-3' |
|        | R   | 5'- CAACCCTCTCGTCCCCTGTCAT-3' |

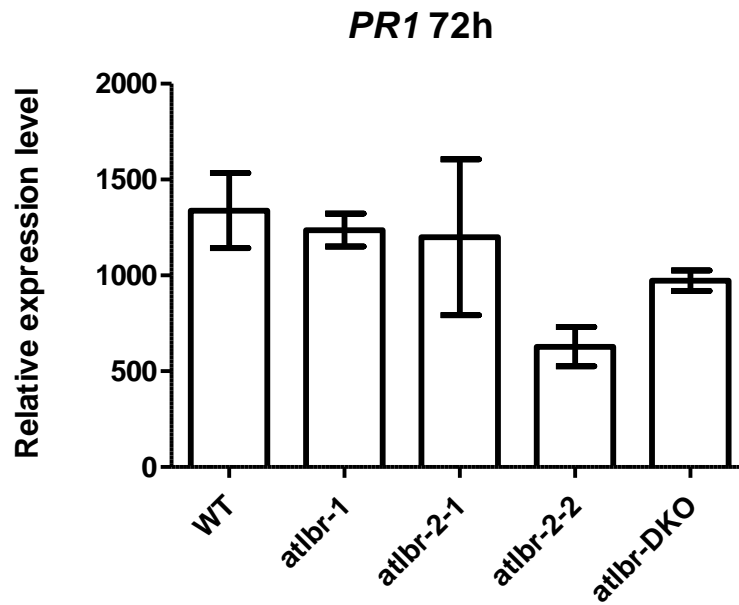

Supplementary Fig. S1. *PR1* mRNA levels in WT and *atlbr* mutant *Arabidopsis* seedlings treated with 100 µg/ml pLPS during 72 h were detected by qRT-PCR. Mean expression values were calculated from the results of three independent experiments. Means  $\pm$  standard errors are presented. Significant differences among means compared with WT plants were evaluated by one-way ANOVA followed by Tukey's multiple comparison test.

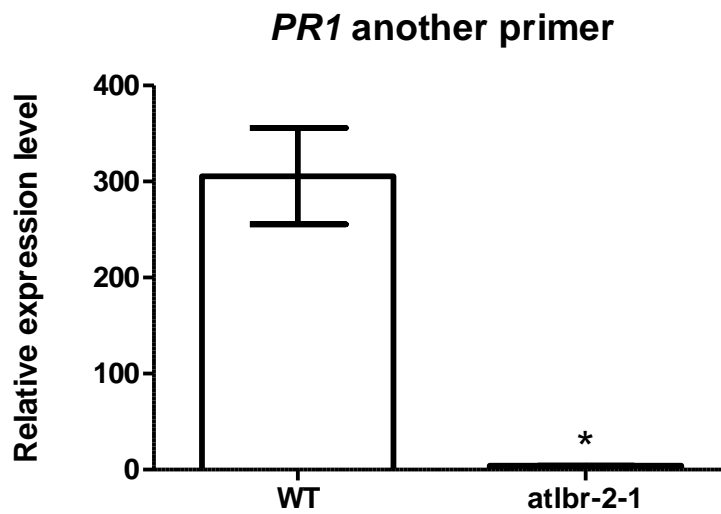

Supplementary Fig. S2. *PR1* mRNA levels in WT and *atlbr-2* *Arabidopsis* seedlings treated with 100  $\mu$ g/ml pLPS during 24 h were detected by qRT-PCR using another set of primers (Supplementary Table S1). Mean expression values were calculated from the results of three independent experiments. Means  $\pm$  standard errors are presented. The significant difference between means was evaluated with a *t*-test; \* $P < 0.05$ .

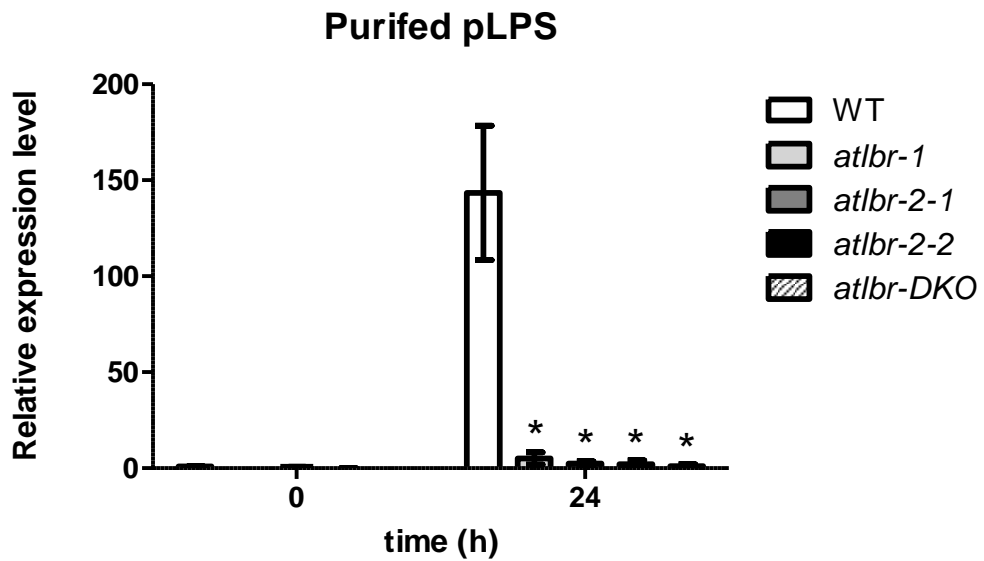

Supplementary Fig. S3. Purchased *P. aeruginosa* LPS was purified by degradation of nucleic acids and proteins with DNase I, RNase, and proteinase K. *PR1* mRNA levels in WT and *atlbr* mutant *Arabidopsis* seedlings treated with 100 µg/ml purified pLPS during 24 h were detected by qRT-PCR. Mean expression values were calculated from the results of three independent experiments. Means ± standard errors are presented. Significant differences among means compared to WT plants were evaluated by two-way ANOVA followed by *post hoc* Bonferroni tests; \* $P < 0.001$ .
